# Supplementary material
Source: publisher figshare collection journal article supplement (https://geolsoc.figshare.com/ndownloader/files/25672627)
Supplement: Supplementary file 1 [file 25672627]

## Sheet: Sheet1
Supplementary Table 3 Trace element contents of the Tengchong volcanic rocks (ppm)
Refercene	Sample number	Age	Rb	Ba	Th	U	Nb	Ta	K2O	La	Ce	Pb	Pr	Sr	P2O3	Nd	Sm	Eu	TiO2	Tb	Y	Yb	Lu
Li and Liu., 2012	HKS01	Qh	103	960	22.47	2.37	28	1.67	3.38	74.22	141.1	19.89	16.36	542	0.43	55.94	9.13	2.05	1.1	1.03	26.51	2.42	0.37
Li and Liu., 2012	HKS02	Qh	124	778	35.16	2.86	19.9	1.37	3.03	76.28	143.2	23.85	17.59	478	0.29	59.89	9.4	1.8	0.96	1	23.74	2.19	0.33
Li and Liu., 2012	HKS03	Qh	118	879	28.74	3.08	26.4	1.67	3.64	68.64	133.1	21.36	15.14	483	0.38	51.87	8.97	1.79	1.01	1	25.51	2.47	0.37
Li and Liu., 2012	HKS04	Qh	113	663	29.57	2.42	17.4	1.17	3.19	62.27	117.5	24.28	14.6	390	0.31	49.81	7.95	1.52	0.97	0.83	20.35	1.87	0.28
Li and Liu., 2012	HKS05	Qh	60	523	17.53	1.66	22.7	1.41	2.71	46	84.94	13.63	10.25	442	0.37	36.21	6.38	1.73	1.4	0.96	28.17	2.77	0.42
Li and Liu., 2012	DYS01	Qh	130	990	32.75	3.25	29	1.93	3.98	86.84	165.8	27.23	18.64	481	0.39	62.7	10.58	2.06	1.01	1.16	30.37	2.84	0.42
Li and Liu., 2012	DYS02	Qh	129	942	34	3.18	27.9	1.76	3.88	77.32	150.4	24.72	16.99	448	0.39	58.88	9.71	1.9	1	1.07	27.35	2.64	0.41
Li and Liu., 2012	DYS03	Qh	187	640	40.61	4.34	15.9	1.31	3.75	68.13	129.7	33.25	15.25	294	0.18	53.4	9.19	1.18	0.56	0.83	20.21	1.83	0.28
Li and Liu., 2012	DYS04	Qh	153	599	40.03	3.86	16.4	1.23	3.94	61.75	124.3	31.84	14.66	273	0.18	53.36	8.63	1.19	0.58	0.82	19.34	1.81	0.28
Li and Liu., 2012	DYS05	Qh	114	1068	32.95	3.16	29.6	1.95	3.68	83.51	158.1	26.25	18.18	489	0.45	62.08	10.63	2.15	1.15	1.16	28.85	2.88	0.44
Li and Liu., 2012	MAS05	Qh	95	855	22.42	2.45	28.5	1.81	3.26	68.36	125.8	19.38	14.23	590	0.46	49.58	8.79	1.94	1.19	1.03	27.33	2.66	0.4
Li and Liu., 2012	MAS06	Qh	36	518	13.22	1.32	18.9	1.15	1.76	32.19	61.26	10	7.25	466	0.34	27.07	5.62	1.57	1.46	0.81	22.22	2.63	0.36
Li and Liu., 2012	MAS07	Qh	109	830	24.78	2.7	27.8	1.81	3.36	69.7	129.4	20.49	14.73	566	0.44	50.07	9.04	1.92	1.14	1.04	27.53	2.68	0.4
Zhou et al.，2000a	TC-1	Qh	104.69	633	22.56	2.57	29.61	1.56		64.96	120.65	22.03	14.14	623.68		47.93	7.847	1.827	1.22	0.961	28.75	2.681	0.411
Zhou et al.，2000a	TC-2	Qh	99.61	610	22.41	2.52	28.49	1.48		61.03	114.1	21.7	12.82	544.85		44.29	7.49	1.643	1.07	0.861	26.3	2.67	0.37
Zhou et al.，2000a	TC-7	Qh	102.06	526	22.07	2.58	27.05	1.58		58.61	109.6	22.31	12.26	523.04		43.19	7.32	1.65	1.04	0.827	25.77	2.594	0.371
Zhou et al.，2000a	TC-8	Qh	133.94	849	31.41	2.83	27.65	1.6		73.33	139.66	28.54	15.87	469.93		55.29	9.192	1.768	0.94	0.935	28.56	2.762	0.362
Zhou et al.，2000a	TC-9	Qh	126.71	812	30.33	2.81	27.15	1.64		72.1	136.51	27.53	15.57	465.03		53.67	8.693	1.792	0.9	0.913	27.62	2.658	0.343
Zhou et al.，2000a	TC-10	Qh	114.24	851	28.59	2.71	27.2	1.51		74.73	138.02	25.03	15.55	477.02		52.97	8.563	1.829	0.93	0.981	27.96	2.717	0.375
Zhou et al.，2000a	TC-18	Qh	120.02	846	28.24	3.06	29.34	1.73		70.95	136.16	25.47	15.36	542.07		53.68	8.986	1.89	1	0.944	27.32	2.717	0.373
Zhou et al.，2000a	TC-22	Qh	96.32	931	23.95	2.4	28.24	1.6		73.19	138.82	22.79	15.9	581.55		56.82	9.058	1.971	1.08	0.988	27.02	2.505	0.351
Zhou et al.，2000a	TC-4	Qₚ³	59.37	443	14.76	1.42	18.1	1.07		34.3	65.97	11.53	7.76	435.54		27.68	5.32	1.456	1.42	0.794	26.31	2.521	0.344
Zhou et al.，2000a	TC-21	Qₚ³	74.06	453	20.16	2.11	20.54	1.22		38.36	75.27	14.83	8.45	430.65		30.26	5.597	1.392	1.1	0.813	25.22	2.659	0.39
Zhou et al.，2000a	TC-31	Qₚ³	68.93	538	24.03	2.12	20.53	1.21		64.25	122.48	15.63	14.36	738.53		48.74	7.919	1.857	1.04	0.853	22.69	2.21	0.301
Zhou et al.，2000a	TC-17	Qₚ³	122.1	589	32.79	3.07	19.42	1.26		64.44	127.97	25.88	14.96	464.39		50.35	8.111	1.587	0.85	0.822	20.21	2.007	0.306
Li and Liu, 2012	MAS01	Qₚ³	44	561	9.89	1	24.7	1.44	2.09	43.02	78.33	8.42	9.53	489	0.44	34.24	6.24	1.86	1.53	0.91	26.26	2.5	0.38
Li and Liu, 2012	MAS02	Qₚ³	45	601	10.18	1.06	23.4	1.38	2.11	44.96	76.84	8.22	9.22	615	0.42	33.6	6.68	1.89	1.49	0.92	28.05	2.58	0.4
Li and Liu, 2012	MAS03	Qₚ³	44	607	10.04	1.07	23.6	1.39	2.07	43.19	74.25	8.33	9	638	0.42	32.77	6.57	1.78	1.47	0.89	27.89	2.56	0.39
Li and Liu, 2012	MAS04	Qₚ³	45	562	10.46	1.13	22.9	1.38	2.08	43.66	73.08	8.72	9.24	558	0.39	33.12	6.78	1.87	1.5	0.94	28.78	2.6	0.39
Zhou et al.，2000	TC-24	Qₚ²	143.02	569	32.78	3.07	13.51	0.94		52.86	100.04	28.04	12.01	336.24		41.99	6.714	1.085	0.51	0.655	18.11	1.564	0.23
Zhou et al.，2000	TC-25	Qₚ²	138.96	593	34.56	3.06	12.46	0.87		55.07	110.11	29.65	13.02	332.92		44.07	7.088	1.102	0.47	0.621	16.45	1.542	0.203
Zhou et al.，2000	TC-27	Qₚ¹	151.01	576	34.65	3.46	14.16	1.09		55.98	110.08	37.45	12.36	294.7		42.95	6.882	1.055	0.48	0.639	17.7	1.746	0.246
Zhou et al.，2000	TC-33	Qₚ¹	146.59	642	35.3	3.15	16.34	1.16		63.82	125.39	29.52	14.4	335.32		50.86	7.989	1.234	0.6	0.783	19.94	1.804	0.255
Zhou et al.，2000	TC-39	Qₚ¹	161.08	626	39.6	3.23	15.6	1.12		57.93	117.32	31.68	13.97	344.99		48.93	7.818	1.313	0.56	0.78	18.36	1.566	0.225
Zhou et al.，2000	TC-12	Qₚ¹	109.91	554	30.19	2.4	19.18	1.17		62.86	120.14	23.92	14.13	497.36		48.66	8.101	1.519	0.91	0.799	22.46	2.001	0.283
Zhou et al.，2000	TC-28	N₂	37.39	550	8.76	1.05	16.05	0.9		34.07	64.24	8.5	7.49	444.38		27.74	5.418	1.483	1.21	0.792	30.57	2.889	0.431
Zhou et al.，2000	TC-34	N₂	61.34	812	15.38	2.11	40.14	2.32		63.16	118.67	17.87	13.88	584.46		48.08	8.79	2.026	1.21	1.042	31.79	3.294	0.473
